# Supplementary material for: Analysis of a Real-World Progression Variable and Related Endpoints for Patients with Five Different Cancer Types
Source: PubMed Central journal article supplement — Adv Ther. 2022 Apr 17;39(6):2831–49. doi: 10.1007/s12325-022-02091-8 (PMC9123022; doi:10.1007/s12325-022-02091-8), 2022-04-17
Supplement: 12325_2022_2091_MOESM1_ESM.pdf [file 12325_2022_2091_MOESM1_ESM.pdf]

## **Supplementary Material**

### **Analysis of a real-world progression variable and related endpoints for patients with five different cancer types**

Aracelis Z. Torres<sup>1</sup>, Nathan C. Nussbaum<sup>1,2</sup>, Christina M. Parrinello<sup>1,3</sup>, Ariel B. Bourla<sup>1</sup>, Bryan E. Bowser<sup>1</sup>, Samuel Wagner<sup>4</sup>, David C. Tabano<sup>4</sup>, Daniel George<sup>5</sup>, Rebecca A. Miksad<sup>1</sup>

<sup>1</sup>Flatiron Health, Inc., New York, NY, USA; <sup>2</sup>New York University School of Medicine, New York, NY, USA; <sup>3</sup>Pine Mountain Consulting, LLC., Redding, CT, USA; <sup>4</sup>Bristol-Myers Squibb, Princeton, NJ, USA; <sup>5</sup>Duke University, Durham, NC, USA.

**Corresponding author:** Rebecca A. Miksad, MD, MPH; Flatiron Health, Inc., 233 Spring Street, Fifth Floor, New York, NY, 10025, ramiksad@flatiron.com

**Supplemental Table 1: rwEndpoint definitions**

|               | Index date                       | Event date                                                                                                                                                                                                                                                                                             | Censor date                                                                                      |
|---------------|----------------------------------|--------------------------------------------------------------------------------------------------------------------------------------------------------------------------------------------------------------------------------------------------------------------------------------------------------|--------------------------------------------------------------------------------------------------|
| <b>rwOS</b>   | Start of 1L therapy <sup>a</sup> | Patient's date of death due to any cause                                                                                                                                                                                                                                                               | Last visit <sup>b</sup> or last abstracted oral episode of drug(s)                               |
| <b>rwPFS</b>  |                                  | Date of first rwP event (abstracted) that occurs more than 14 days after index date or date of death, whichever occurs first.                                                                                                                                                                          | Last unstructured clinic note assessed for rwP                                                   |
| <b>rwTTP</b>  |                                  | Date of first rwP event (abstracted) that occurs more than 14 days after index date.                                                                                                                                                                                                                   | Last unstructured clinic note assessed for rwP                                                   |
| <b>rwTTD</b>  |                                  | Last administration or non-cancelled order (IV drugs) or last abstracted oral episode of drug(s) contained in the index therapy. Permanent discontinuation was defined as meeting one of the following conditions: start of index therapy, a gap in treatment after the end of index therapy or death. | Last administration or non-cancelled order (IV drugs) or last abstracted oral episode of drug(s) |
| <b>rwTTNT</b> |                                  | Date of the start of line of therapy subsequent to index therapy or date of death, whichever occurs first.                                                                                                                                                                                             | Last visit <sup>b</sup>                                                                          |

<sup>a</sup>Index date was 2L therapy for the aMel cohort

<sup>b</sup>Visit categorized as vitals (any date on which a patient had a structured vitals measurement in the EHR); treatment (any date on which a patient had a structured medication administration in the EHR); lab (any date on which a patient had a structured lab in the EHR)

Abbreviations: 1L, first line; 2L, second line; aMel, advanced melanoma; EHR, electronic health record; IV, intravenous; rwOS, real-world overall survival; rwP, real-world progression; rwPFS, real-world progression-free survival; rwTTD, real-world time-to-discontinuation; rwTTP, real-world time-to-progression; rwTTNT, real-world time-to-next treatment.

**Supplemental Table 2: Baseline table for each analytic cohort by disease**

Table 2a: mBC cohort

| <b>Characteristic</b>                                      | <b>mBC cohort<br/>N=884</b> |
|------------------------------------------------------------|-----------------------------|
| <b>Age at metastatic diagnosis (years), median [IQR]</b>   | 64.0 [54.0;74.0]            |
| <b>Age at metastatic diagnosis category (years), n (%)</b> |                             |
| <35                                                        | 8 (0.9)                     |
| 35–44                                                      | 127 (14.4)                  |
| 45–54                                                      | 315 (35.6)                  |
| 55–64                                                      | 228 (25.8)                  |
| ≥65                                                        | 206 (23.3)                  |
| <b>Sex, n (%)</b>                                          |                             |
| Female                                                     | 870 (98.4)                  |
| Male                                                       | 14 (1.6)                    |
| <b>Region, n (%)</b>                                       |                             |
| Northeast                                                  | 201 (22.7)                  |
| Midwest                                                    | 149 (16.9)                  |
| South                                                      | 315 (35.6)                  |
| West                                                       | 161 (18.2)                  |
| Other/Missing                                              | 58 (6.6)                    |
| <b>Practice type, n (%)</b>                                |                             |
| Academic                                                   | 44 (5.0)                    |
| Community                                                  | 840 (95.0)                  |

|                                            |            |
|--------------------------------------------|------------|
| <b>Race, n (%)</b>                         |            |
| White                                      | 607 (68.7) |
| Black                                      | 86 (9.7)   |
| Asian                                      | 12 (1.4)   |
| Other Race                                 | 126 (14.3) |
| Unknown/missing                            | 53 (6.0)   |
| <b>Stage at diagnosis, n (%)</b>           |            |
| Stage I                                    | 84 (9.5)   |
| Stage II                                   | 216 (24.4) |
| Stage III                                  | 180 (20.4) |
| Stage IV                                   | 282 (31.9) |
| Stage not reported                         | 122 (13.8) |
| <b>ER tested, n (%)</b>                    | 868 (98.2) |
| <b>ER status among those tested, n (%)</b> |            |
| Negative                                   | 225 (25.9) |
| Positive                                   | 642 (74.0) |
| Results unknown/not documented             | 1 (0.1)    |
| <b>PR tested, n (%)</b>                    | 868 (98.2) |
| <b>PR status among those tested, n (%)</b> |            |
| Negative                                   | 344 (39.6) |
| Positive                                   | 485 (55.9) |
| Results unknown/not documented             | 39 (4.5)   |

|                                                                                                                                                                                                                                                                    |            |
|--------------------------------------------------------------------------------------------------------------------------------------------------------------------------------------------------------------------------------------------------------------------|------------|
| <b>HER2 tested, n (%)</b>                                                                                                                                                                                                                                          | 841 (95.1) |
| <b>HER2 status among those tested, n (%)</b>                                                                                                                                                                                                                       |            |
| Negative                                                                                                                                                                                                                                                           | 650 (77.3) |
| Positive                                                                                                                                                                                                                                                           | 148 (17.6) |
| Equivocal                                                                                                                                                                                                                                                          | 33 (4.0)   |
| Results unknown/not documented                                                                                                                                                                                                                                     | 10 (1.3)   |
| <b>HR/HER2 status among those tested, n (%)</b>                                                                                                                                                                                                                    |            |
| HR- and HER2+                                                                                                                                                                                                                                                      | 45 (5.1)   |
| HR+ and HER2-                                                                                                                                                                                                                                                      | 508 (57.5) |
| HR+ and HER2+                                                                                                                                                                                                                                                      | 100 (11.3) |
| Triple Negative                                                                                                                                                                                                                                                    | 132 (14.9) |
| HR/HER2 status unknown/not documented                                                                                                                                                                                                                              | 99 (11.2)  |
| <b>First-line therapy class, n (%)</b>                                                                                                                                                                                                                             |            |
| CDK4/6 inhibitor-based therapy                                                                                                                                                                                                                                     | 0 (0.0)    |
| Chemo + HER2 targeted-based therapy                                                                                                                                                                                                                                | 95 (10.7)  |
| Chemotherapy                                                                                                                                                                                                                                                       | 351 (39.7) |
| Clinical study drug-based therapies                                                                                                                                                                                                                                | 3 (0.3)    |
| Endocrine therapy                                                                                                                                                                                                                                                  | 376 (42.5) |
| HER2 targeted-based therapy                                                                                                                                                                                                                                        | 32 (3.6)   |
| mTOR inhibitor-based therapy                                                                                                                                                                                                                                       | 11 (1.2)   |
| Other therapies                                                                                                                                                                                                                                                    | 16 (1.8)   |
| Abbreviations: CDK, cyclin-dependent kinase; ER, estrogen receptor; HER2, human epidermal growth factor receptor 2; HR, hormone receptor; IQR, interquartile range; mBC, metastatic breast cancer; mTOR, mammalian target of rapamycin; PR, progesterone receptor. |            |

Table 2b: aMel cohort

|                                                          | <b>aMel cohort<br/>N = 152</b> |
|----------------------------------------------------------|--------------------------------|
| <b>Age at advanced diagnosis (years), median [IQR]</b>   | 64.0 [56.0; 75.0]              |
| <b>Age at advanced diagnosis category (years), n (%)</b> |                                |
| <35                                                      | 7 (4.6)                        |
| 35–44                                                    | 16 (10.5)                      |
| 45–54                                                    | 56 (36.8)                      |
| 55–64                                                    | 32 (21.1)                      |
| ≥65                                                      | 41 (27.0)                      |
| <b>Sex, n (%)</b>                                        |                                |
| Female                                                   | 50 (32.9)                      |
| Male                                                     | 102 (67.1)                     |
| <b>Region, n (%)</b>                                     |                                |
| Northeast                                                | 24 (19.7)                      |
| Midwest                                                  | 23 (15.8)                      |
| South                                                    | 63 (41.4)                      |
| West                                                     | 12 (7.9)                       |
| Other/Missing                                            | 30 (19.7)                      |
| <b>Practice type, n (%)</b>                              |                                |
| Academic                                                 | 29 (19.1)                      |
| Community                                                | 123 (80.9)                     |
| <b>Race, n (%)</b>                                       |                                |
| White                                                    | 127 (83.6)                     |

|                                               |            |
|-----------------------------------------------|------------|
| Black                                         | 1 (0.7)    |
| Asian                                         | 0 (0.0)    |
| Other Race                                    | 12 (7.9)   |
| Unknown/Not Documented                        | 12 (7.9)   |
| <b>Stage at diagnosis, n (%)</b>              |            |
| Stage I                                       | 10 (6.6)   |
| Stage II                                      | 33 (21.7)  |
| Stage III                                     | 29 (19.1)  |
| Stage IV                                      | 42 (27.6)  |
| Group stage is not reported                   | 38 (25.0)  |
| <b>BRAF tested, n (%)</b>                     | 147 (96.7) |
| <b>BRAF status among those tested, n (%)</b>  |            |
| Mutation negative                             | 71 (48.3)  |
| Mutation positive                             | 75 (51.0)  |
| Results unknown/not documented                | 1 (0.7)    |
| <b>KIT tested, n (%)</b>                      | 45 (29.6)  |
| <b>KIT status among those tested, n (%)</b>   |            |
| Mutation negative                             | 39 (86.7)  |
| Mutation positive                             | 5 (11.1)   |
| Results unknown/not documented                | 1 (2.2)    |
| <b>PD-L1 tested, n (%)</b>                    | 10 (6.6)   |
| <b>PD-L1 status among those tested, n (%)</b> |            |
| PD-L1 negative/not detected                   | 3 (30.0)   |
| PD-L1 positive                                | 2 (20.0)   |

|                                                                                                                                            |           |
|--------------------------------------------------------------------------------------------------------------------------------------------|-----------|
| Results unknown/not documented                                                                                                             | 2 (20.0)  |
| No interpretation given in report                                                                                                          | 3 (30.0)  |
| <b>NRAS tested, n (%)</b>                                                                                                                  | 43 (28.3) |
| <b>NRAS status among those tested, n (%)</b>                                                                                               |           |
| Mutation negative                                                                                                                          | 33 (76.7) |
| Mutation positive                                                                                                                          | 9 (20.9)  |
| Results unknown/not documented                                                                                                             | 1 (2.3)   |
| <b>First-line therapy class, n (%)</b>                                                                                                     |           |
| (Peg)interferon-based therapies                                                                                                            | 0 (0.0)   |
| BRAF/MEK-based therapies                                                                                                                   | 36 (23.7) |
| Chemotherapy only (single-agent or combos)                                                                                                 | 20 (13.2) |
| Clinical study drug-based therapies                                                                                                        | 2 (1.3)   |
| Modified viral therapies                                                                                                                   | 1 (0.7)   |
| PD-1/PD-L1-based therapies                                                                                                                 | 56 (36.8) |
| Yervoy + PD-1/PD-L1-based therapies                                                                                                        | 10 (6.6)  |
| Yervoy-based therapies                                                                                                                     | 22 (14.5) |
| Other therapies                                                                                                                            | 5 (3.3)   |
| Abbreviations: aMel, advanced melanoma; IQR, interquartile range; PD-1, programmed cell death protein 1; PD-L1, programmed death-ligand 1. |           |

Table 2c: SCLC cohort



|                                                           | <b>SCLC cohort<br/>N=359</b> |
|-----------------------------------------------------------|------------------------------|
| <b>Age at initial diagnosis (years), median [IQR]</b>     | 68.0 [60.0;74.5]             |
| <b>Age categories at initial diagnosis (years), n (%)</b> |                              |
| <35                                                       | 1 (0.28)                     |
| 35–49                                                     | 16 (4.5)                     |
| 50–64                                                     | 125 (34.8)                   |
| ≥65                                                       | 217 (60.4)                   |
| <b>Sex, n (%)</b>                                         |                              |
| Female                                                    | 178 (49.6)                   |
| Male                                                      | 181 (50.4)                   |
| <b>Region, n (%)</b>                                      |                              |
| Northeast                                                 | 81 (22.6)                    |
| Midwest                                                   | 78 (21.7)                    |
| South                                                     | 132 (36.8)                   |
| West                                                      | 45 (12.5)                    |
| Other/Missing                                             | 23 (6.4)                     |
| <b>Practice type, n (%)</b>                               |                              |
| Academic                                                  | 22 (6.1)                     |
| Community                                                 | 337 (93.9)                   |
| <b>Race, n (%)</b>                                        |                              |
| White                                                     | 250 (69.6)                   |
| Black                                                     | 25 (7.0)                     |
| Asian                                                     | 1 (0.3)                      |
| Other Race                                                | 35 (9.7)                     |

|                                                |            |
|------------------------------------------------|------------|
| Unknown/missing                                | 48 (13.4)  |
| <b>Smoking status, n (%)</b>                   |            |
| History of smoking                             | 352 (98.1) |
| No history of smoking                          | 7 (1.9)    |
| Unknown/not documented                         | 0 (0.0)    |
| <b>Stage at diagnosis, n (%)</b>               |            |
| Stage I                                        | 10 (2.8)   |
| Stage II                                       | 11 (3.1)   |
| Stage III                                      | 58 (16.2)  |
| Stage IV                                       | 199 (55.4) |
| Stage not reported                             | 81 (22.6)  |
| <b>SCLC-specific stage at diagnosis, n (%)</b> |            |
| Extensive disease                              | 231 (64.3) |
| Limited disease                                | 105 (29.2) |
| Unknown/not documented                         | 23 (6.4)   |
| <b>Resection, n (%)</b>                        |            |
| Yes                                            | 10 (2.8)   |
| No/unknown                                     | 349 (97.2) |
| <b>Upfront radiation therapy, n (%)</b>        |            |
| Yes                                            | 123 (34.3) |
| No/unknown                                     | 236 (65.7) |
| <b>First-line therapy class, n (%)</b>         |            |
| Platinum + Etoposide                           | 339 (94.4) |
| Other                                          | 19 (5.3)   |

|                                                                        |         |
|------------------------------------------------------------------------|---------|
| Unknown/not documented                                                 | 1 (0.3) |
| Abbreviations: IQR, interquartile range; SCLC, small cell lung cancer. |         |

Table 2d: mRCC cohort

|                                                              | <b>mRCC cohort<br/>N=323</b> |
|--------------------------------------------------------------|------------------------------|
| <b>Age at metastatic diagnosis (years), median [IQR]</b>     | 66.0 [58.0;73.0]             |
| <b>Age categories at metastatic diagnosis (years), n (%)</b> |                              |
| <35                                                          | 2 (0.6)                      |
| 35–49                                                        | 14 (4.3)                     |
| 50–64                                                        | 125 (38.7)                   |
| ≥65                                                          | 182 (56.3)                   |
| <b>Sex, n (%)</b>                                            |                              |
| Female                                                       | 86 (26.6)                    |
| Male                                                         | 237 (73.4)                   |
| <b>Region, n (%)</b>                                         |                              |
| Northeast                                                    | 56 (17.3)                    |
| Midwest                                                      | 58 (18.0)                    |
| South                                                        | 119 (36.8)                   |
| West                                                         | 58 (18.0)                    |
| Other/Missing                                                | 32 (9.9)                     |
| <b>Practice type, n (%)</b>                                  |                              |
| Academic                                                     | 25 (7.7)                     |
| Community                                                    | 298 (92.3)                   |

|                                        |            |
|----------------------------------------|------------|
| <b>Race, n (%)</b>                     |            |
| White                                  | 215 (66.6) |
| Black or African American              | 23 (7.1)   |
| Asian                                  | 4 (1.2)    |
| Other Race                             | 48 (14.9)  |
| Unknown/missing                        | 33 (10.2)  |
| <b>Smoking status, n (%)</b>           |            |
| History of smoking                     | 202 (62.5) |
| No history of smoking                  | 119 (36.8) |
| Unknown/Not documented                 | 2 (0.6)    |
| <b>Stage at diagnosis, n (%)</b>       |            |
| Stage I–III                            | 124 (38.4) |
| Stage IV                               | 189 (58.5) |
| Stage not reported                     | 10 (3.1)   |
| <b>Histology, n (%)</b>                |            |
| Clear Cell                             | 225 (69.7) |
| Non-clear Cell                         | 31 (9.6)   |
| RCC, NOS                               | 67 (20.7)  |
| <b>Nephrectomy, n (%)</b>              |            |
| Yes, pre-metastatic                    | 125 (38.7) |
| Yes, post-metastatic                   | 75 (23.2)  |
| Yes, date unknown                      | 2 (0.6)    |
| No                                     | 121 (37.5) |
| <b>First-line therapy class, n (%)</b> |            |

|                                                                                                                                                                                                                              |            |
|------------------------------------------------------------------------------------------------------------------------------------------------------------------------------------------------------------------------------|------------|
| Anti-VEGF TKI                                                                                                                                                                                                                | 233 (72.1) |
| mTOR inhibitor                                                                                                                                                                                                               | 39 (12.1)  |
| PD-1/PD-L1 therapy                                                                                                                                                                                                           | 14 (4.3)   |
| Other therapies                                                                                                                                                                                                              | 37 (11.5)  |
| Abbreviations: IQR, interquartile range; mRCC, metastatic renal cell carcinoma; mTOR, mammalian target of rapamycin; TKI, tyrosine kinase inhibitor; NOS, not otherwise specified; VEGF, vascular endothelial growth factor. |            |

Table 2e: aGEC cohort

|                                                                 |                              |
|-----------------------------------------------------------------|------------------------------|
|                                                                 | <b>aGEC cohort<br/>N=370</b> |
| <b>Age at advanced diagnosis date (years), median [IQR]</b>     | 67.0 [58.0;74.0]             |
| <b>Age categories at advanced diagnosis date (years), n (%)</b> |                              |
| <35                                                             | 2 (0.5)                      |
| 35–49                                                           | 28 (7.6)                     |
| 50–64                                                           | 133 (35.9)                   |
| ≥65                                                             | 207 (56.0)                   |
| <b>Sex, n (%)</b>                                               |                              |
| Female                                                          | 89 (24.1)                    |
| Male                                                            | 281 (75.9)                   |
| <b>Region, n (%)</b>                                            |                              |
| Northeast                                                       | 28 (7.6)                     |
| Midwest                                                         | 30 (8.1)                     |
| South                                                           | 152 (41.1)                   |
| West                                                            | 160 (43.2)                   |

|                                  |             |
|----------------------------------|-------------|
| Other/missing                    | 0 (0.0)     |
| <b>Practice type, n (%)</b>      |             |
| Academic                         | 0 (0.0)     |
| Community                        | 370 (100.0) |
| <b>Race, n (%)</b>               |             |
| White                            | 264 (71.4)  |
| Black or African American        | 24 (6.5)    |
| Asian                            | 9 (2.4)     |
| Other Race                       | 28 (7.6)    |
| Unknown/missing                  | 45 (12.2)   |
| <b>Smoking status, n (%)</b>     |             |
| History of smoking               | 264 (71.4)  |
| No history of smoking            | 106 (28.6)  |
| Unknown/Not documented           | 0 (0.0)     |
| <b>Stage at diagnosis, n (%)</b> |             |
| Stage I                          | 18 (4.9)    |
| Stage II                         | 66 (17.8)   |
| Stage III                        | 75 (20.3)   |
| Stage IV                         | 176 (47.6)  |
| Stage not reported               | 35 (9.5)    |
| <b>Disease site, n (%)</b>       |             |
| Esophageal                       | 175 (47.3)  |
| Gastric                          | 112 (30.3)  |
| Gastroesophageal Junction        | 83 (22.4)   |

|                                                                                                                                                                              |            |
|------------------------------------------------------------------------------------------------------------------------------------------------------------------------------|------------|
| <b>Histology, n (%)</b>                                                                                                                                                      |            |
| Adenocarcinoma                                                                                                                                                               | 306 (82.7) |
| Adenosquamous                                                                                                                                                                | 3 (0.8)    |
| Squamous Cell Carcinoma                                                                                                                                                      | 58 (15.7)  |
| Other                                                                                                                                                                        | 2 (0.5)    |
| Unknown/Not Documented                                                                                                                                                       | 1 (0.3)    |
| <b>Surgery status, n (%)</b>                                                                                                                                                 |            |
| Surgery on or before index                                                                                                                                                   | 55 (14.9)  |
| Unknown surgery date                                                                                                                                                         | 0 (0.0)    |
| No surgery on or before index                                                                                                                                                | 315 (85.1) |
| <b>HER2 tested, n (%)</b>                                                                                                                                                    | 233 (63.0) |
| <b>HER2 status among those tested, n (%)</b>                                                                                                                                 |            |
| Positive                                                                                                                                                                     | 42 (18.0)  |
| Negative                                                                                                                                                                     | 178 (76.4) |
| Equivocal                                                                                                                                                                    | 4 (1.7)    |
| Results unknown/not documented                                                                                                                                               | 9 (3.9)    |
| <b>First-line therapy class, n (%)</b>                                                                                                                                       |            |
| Chemo mono or combination                                                                                                                                                    | 317 (85.7) |
| Anti-VEGF +/- chemo-based                                                                                                                                                    | 8 (2.2)    |
| HER2 +/- chemo-based                                                                                                                                                         | 28 (7.6)   |
| Clinical study drug-based                                                                                                                                                    | 12 (3.2)   |
| Other therapies                                                                                                                                                              | 5 (1.4)    |
| Abbreviations: aGEC, advanced gastric/esophageal cancer; HER2, human epidermal growth factor receptor 2; IQR, interquartile range; VEGF, vascular endothelial growth factor. |            |
